# Supplementary material for: Synthesis, characterization and X-ray crystal structures of cyclam derivatives. Part VI. Proton binding studies of a pyridine-strapped 5,12-dioxocyclam based macrobicycle
Source: Royal Society of Chemistry journal article supplement (doi:10.1039/b410260f), 2004-12-14
Supplement: b410260f.pdf [file b410260f.pdf]

# Supplementary Material (ESI) for New Journal of Chemistry

# This journal is © The Royal Society of Chemistry and

# The Centre National de la Recherche Scientifique, 2004

**Synthesis, Characterization and X-Ray Crystal Structures of Cyclam  
Derivatives. Part VI. Proton Binding Studies of a Pyridine-Strapped  
5,12-Dioxocyclam-Based Macrobicycle**

Michel Meyer,<sup>a</sup> Laurent Frémond,<sup>a</sup> Alain Tabard,<sup>a</sup> Enrique Espinosa,<sup>a</sup> Guy Yves Vollmer,<sup>a</sup>  
Roger Guillard\*<sup>a</sup> and Yves Dory<sup>b</sup>

<sup>a</sup> *Laboratoire d'Ingénierie Moléculaire pour la Séparation et les Applications des Gaz (LIMSAG, UMR 5633 du CNRS), Université de Bourgogne, Faculté des Sciences, 6 boulevard Gabriel, 21100 Dijon, France. Fax: 33 3 80 39 61 17; Tel: 33 3 80 39 61 11; E-mail: Roger.Guillard@u-bourgogne.fr*

<sup>b</sup> *Laboratoire de Synthèse Supramoléculaire, Département de Chimie, Université de Sherbrooke, 2500 boulevard de l'Université, Sherbrooke J1K 2R1, Québec, Canada*

## **Supporting Information**

\* To whom correspondence should be addressed.

**Content**

- Fig. S1**  $^1\text{H}$ - $^1\text{H}$  COSY spectrum of ligand  $\text{L}^1$ .
- Fig. S2** Enlargement of the  $^1\text{H}$ - $^1\text{H}$  COSY spectrum of ligand  $\text{L}^1$  in the aliphatic region.
- Fig. S3**  $^1\text{H}$ - $^{13}\text{C}$  HETCOR spectrum of ligand  $\text{L}^1$ .
- Table S1** DFT-calculated energies (B3LYP/6-31G\*) of  $\text{L}^1$  in different geometries.
- Table S2** DFT-calculated energies (B3LYP/6-31G\*) of  $[\text{H}(\text{L}^1)]^+$  in different geometries.
- Table S3** DFT-calculated energies (B3LYP/6-31G\*) of  $[\text{H}_2(\text{L}^1)]^{2+}$  in different geometries.
- Table S4** Cartesian  $x,y,z$  coordinates of DFT-minimized (B3LYP/6-31G\*) lowest-energy conformers of  $\text{L}^1$ .
- Table S5** Cartesian  $x,y,z$  coordinates of DFT-minimized (B3LYP/6-31G\*) lowest-energy conformers of  $[\text{H}(\text{L}^1)]^+$ .
- Table S6** Cartesian  $x,y,z$  coordinates of DFT-minimized (B3LYP/6-31G\*) lowest-energy conformers of  $[\text{H}_2(\text{L}^1)]^{2+}$ .

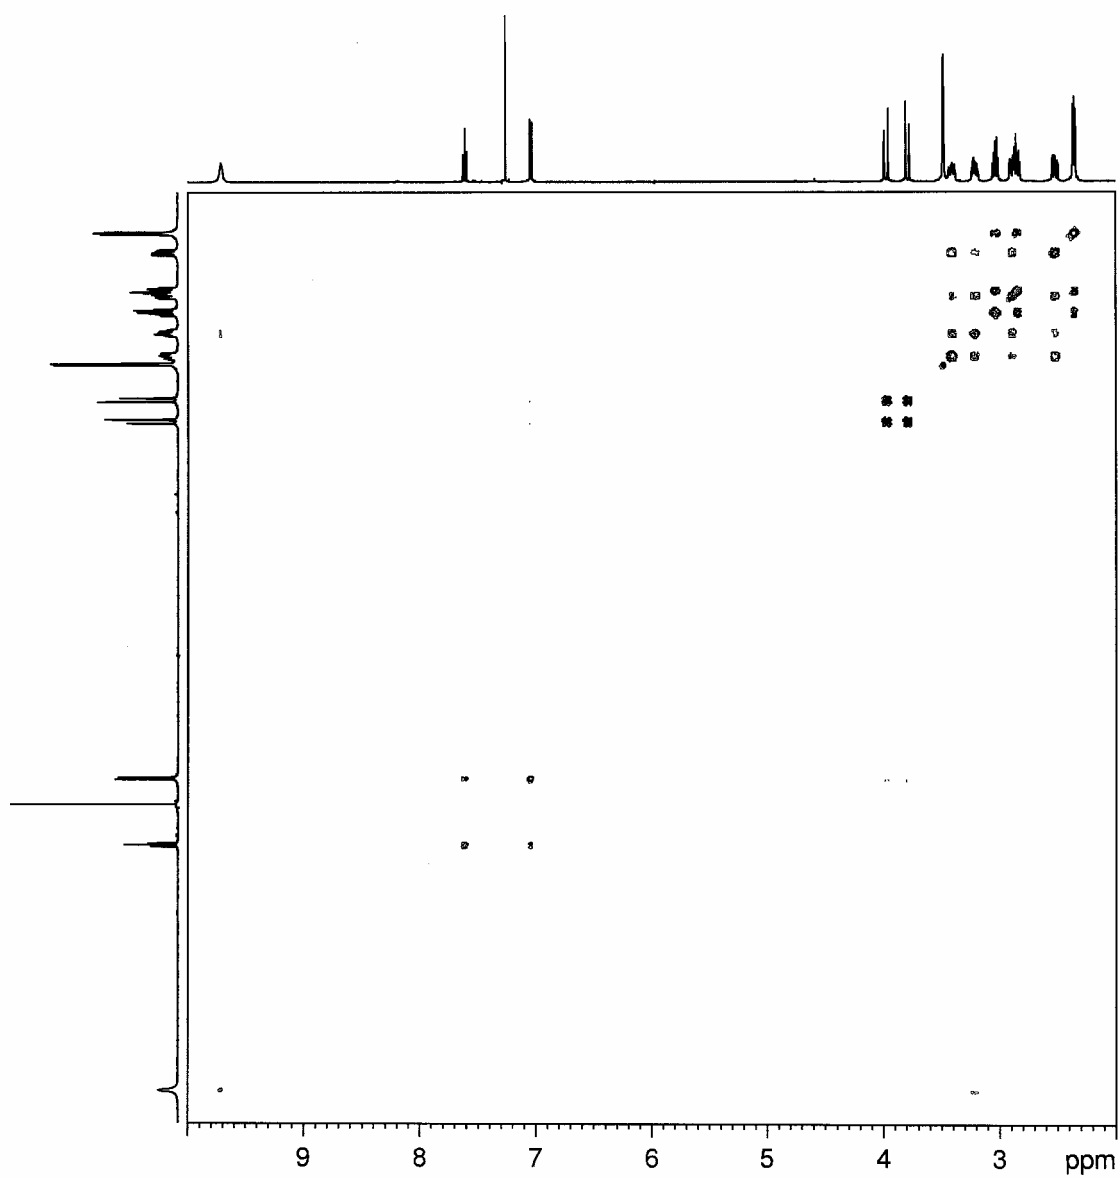

**Fig. S1**  $^1\text{H}$ - $^1\text{H}$  COSY (500 MHz) spectrum of ligand **L**<sup>1</sup> recorded in  $\text{CDCl}_3$  at room temperature.

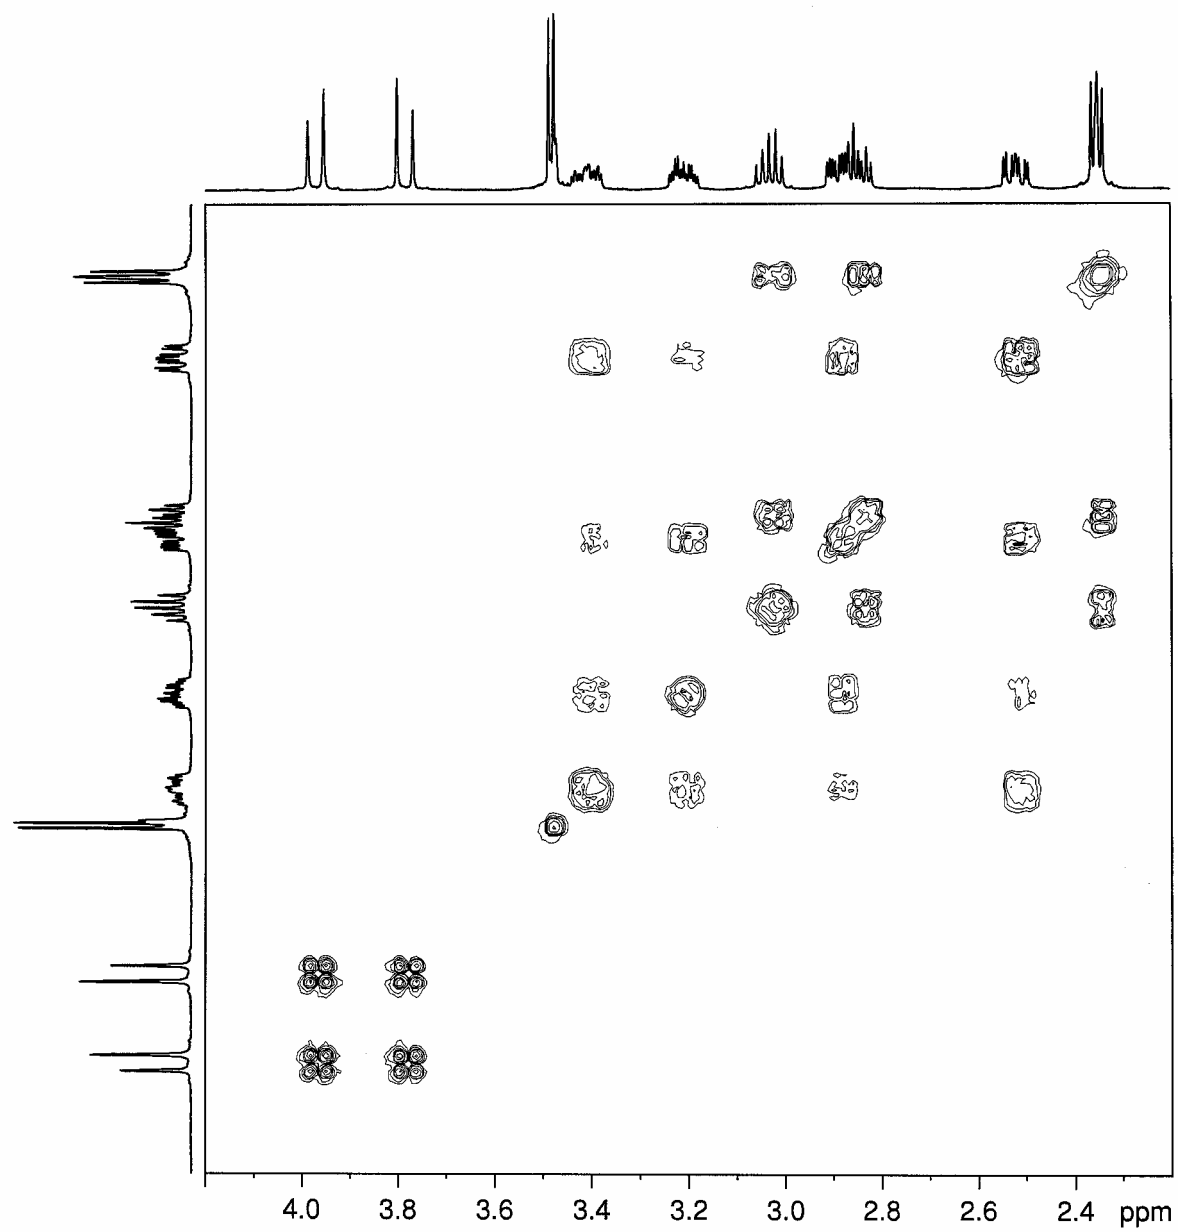

**Fig. S2** Enlargement showing the aliphatic region of the <sup>1</sup>H–<sup>1</sup>H COSY spectrum of ligand L<sup>1</sup> recorded in CDCl<sub>3</sub> at room temperature.

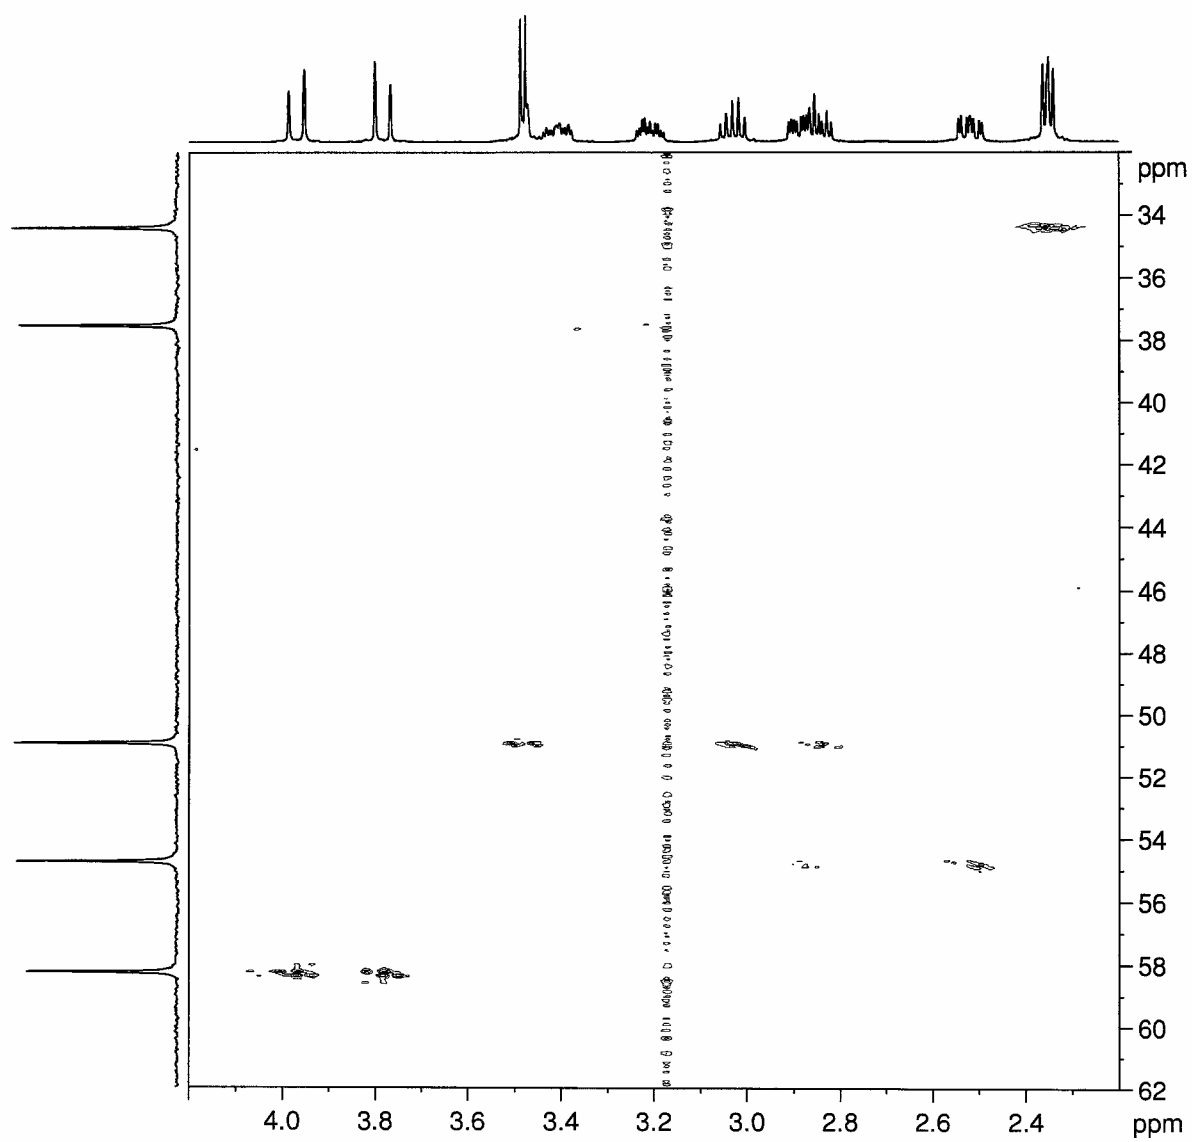

**Fig. S3**  $^1\text{H}$ - $^{13}\text{C}$  HETCOR spectrum of ligand  $\text{L}^1$  recorded in  $\text{CDCl}_3$  at room temperature.

**Table S1** DFT-calculated energies (B3LYP/6-31G\*) of **L<sup>1</sup>** in different geometries.

| <b>L<sup>1</sup></b>                                                                | $E$ (ua mol <sup>-1</sup> ) | $\Delta E$ (kcal mol <sup>-1</sup> ) |
|-------------------------------------------------------------------------------------|-----------------------------|--------------------------------------|
| 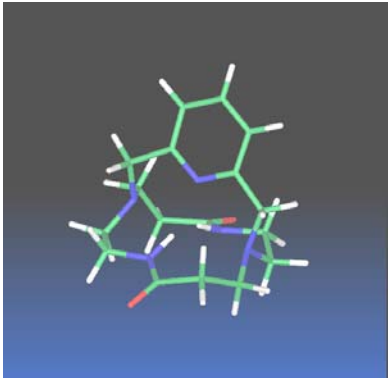   | $-1086.423576$              | 0                                    |
|   | $-1086.408717$              | $-9.32408525$                        |
|  | $-1086.367948$              | $-34.90675825$                       |

**Table S2** DFT-calculated energies (B3LYP/6-31G\*) of  $[H(L^1)]^+$  in different geometries.

| $[H(L^1)]^+$                                                                        | $E$ (ua mol <sup>-1</sup> ) | $\Delta E$ (kcal mol <sup>-1</sup> ) |
|-------------------------------------------------------------------------------------|-----------------------------|--------------------------------------|
| 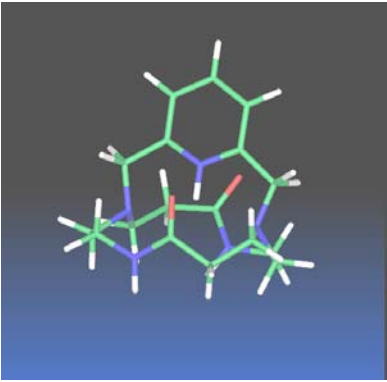   | $-1086.834101$              | 0                                    |
|   | $-1086.814206$              | 12.48404975                          |
|  | $-1086.786038$              | 30.15959525                          |

**Table S3** DFT-calculated energies (B3LYP/6-31G\*) of  $[\text{H}_2(\text{L}^1)]^{2+}$  in different geometries.

| $[\text{H}(\text{L}^1)]^+$                                                          | $E$ (ua mol <sup>-1</sup> )                                                       | $\Delta E$ (kcal mol <sup>-1</sup> ) |
|-------------------------------------------------------------------------------------|-----------------------------------------------------------------------------------|--------------------------------------|
| 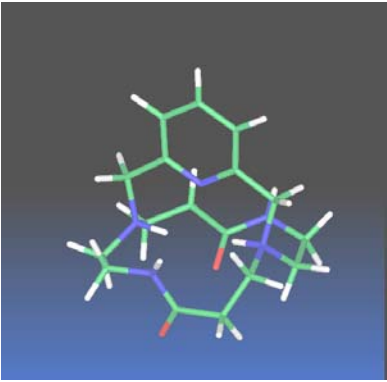   | $in-(\text{NH})^+, \text{N}_{\text{py}}, in-(\text{NH})^+$<br>-1087.11241         | 0                                    |
|   | $in-\text{N}, (\text{N}_{\text{py}}\text{H})^+, in-(\text{NH})^+$<br>-1087.082982 | 18.4656935                           |
|  | $in-(\text{NH})^+, \text{N}_{\text{py}}, out-(\text{NH})^+$<br>-1087.07336        | 24.50368675                          |
|  | $in-(\text{NH})^+, \text{N}_{\text{py}}, in-(\text{NH})^+$<br>-1087.053624        | 36.88827775                          |



| $[\text{H}(\text{L}^1)]^+$                                                          | $E$ (ua mol $^{-1}$ )                                                              | $\Delta E$ (kcal mol $^{-1}$ ) |
|-------------------------------------------------------------------------------------|------------------------------------------------------------------------------------|--------------------------------|
| 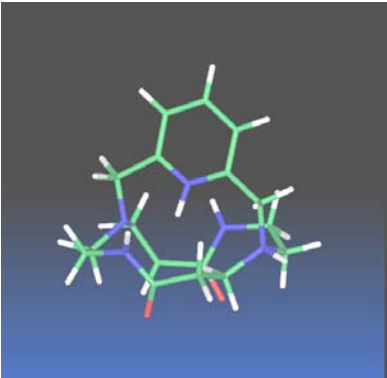   | $in\text{-N}, (\text{N}_{\text{py}}\text{H})^+, out\text{-(NH)}^+$<br>-1087.051722 | 38.08128075                    |
|   | $in\text{-N}, (\text{N}_{\text{py}}\text{H})^+, in\text{-(NH)}^+$<br>-1087.029574  | 51.97915075                    |
|  | $out\text{-(NH)}^+, \text{N}_{\text{py}}, out\text{-(NH)}^+$<br>-1087.027026       | 53.57814625                    |
|  | $out\text{-(NH)}^+, (\text{N}_{\text{py}}\text{H})^+, out\text{-N}$<br>-1086.99354 | 74.59061125                    |

**Table S4** Cartesian  $x,y,z$  coordinates of DFT-minimized (B3LYP/6-31G\*) lowest-energy conformers of **L**<sup>1</sup>.

| Atom | $x$     | $y$     | $z$     |
|------|---------|---------|---------|
| N    | 0.2517  | -1.0308 | -1.9048 |
| C    | 0.6645  | -2.4423 | -1.8595 |
| H    | 1.6874  | -2.4686 | -1.4668 |
| H    | 0.7075  | -2.8699 | -2.8786 |
| C    | -0.2089 | -3.3562 | -0.9793 |
| H    | 0.0814  | -4.3945 | -1.1667 |
| H    | -1.2639 | -3.2749 | -1.2690 |
| C    | -0.1058 | -3.1552 | 0.5390  |
| O    | -0.0377 | -4.1149 | 1.3033  |
| N    | -0.1361 | -1.8576 | 0.9483  |
| H    | -0.0951 | -1.1290 | 0.2393  |
| C    | -0.0189 | -1.4707 | 2.3416  |
| H    | 1.0198  | -1.1883 | 2.5780  |
| H    | -0.2514 | -2.3533 | 2.9436  |
| C    | -0.9833 | -0.3372 | 2.7102  |
| H    | -0.8622 | -0.1236 | 3.7908  |
| H    | -2.0071 | -0.6964 | 2.5636  |
| N    | -0.8272 | 0.8764  | 1.9003  |
| C    | -2.0334 | 1.7151  | 1.8719  |
| H    | -2.1336 | 2.3133  | 2.7990  |
| H    | -2.8952 | 1.0396  | 1.8460  |
| C    | -2.1333 | 2.6739  | 0.6706  |
| H    | -1.2111 | 3.2692  | 0.5839  |
| H    | -2.9430 | 3.3841  | 0.8599  |
| C    | -2.4354 | 2.0683  | -0.7103 |
| O    | -3.3134 | 2.5436  | -1.4269 |
| N    | -1.6475 | 1.0212  | -1.0853 |
| C    | -1.5890 | 0.6007  | -2.4762 |
| C    | -0.9932 | -0.8026 | -2.6491 |
| H    | -1.7228 | -1.5295 | -2.2819 |
| H    | -0.8676 | -0.9921 | -3.7336 |
| H    | -1.0204 | 1.3338  | -3.0702 |
| H    | -2.6028 | 0.6096  | -2.8859 |
| H    | -0.8305 | 0.8123  | -0.5092 |
| C    | 0.4209  | 1.5958  | 2.1549  |
| C    | 1.5219  | 1.2906  | 1.1353  |
| C    | 2.8795  | 1.5370  | 1.3850  |
| C    | 3.8027  | 1.2344  | 0.3856  |
| C    | 3.3621  | 0.6794  | -0.8205 |
| C    | 1.9941  | 0.4621  | -0.9839 |
| N    | 1.1160  | 0.7852  | -0.0275 |
| C    | 1.3668  | -0.1362 | -2.2404 |
| H    | 0.9978  | 0.6899  | -2.8596 |
| H    | 2.1345  | -0.6422 | -2.8463 |
| H    | 4.0659  | 0.4120  | -1.6043 |
| H    | 4.8630  | 1.4098  | 0.5498  |
| H    | 3.2014  | 1.9463  | 2.3386  |
| H    | 0.8058  | 1.3886  | 3.1682  |
| H    | 0.2261  | 2.6756  | 2.1280  |

**Table S5** Cartesian  $x,y,z$  coordinates of DFT-minimized (B3LYP/6-31G\*) lowest-energy conformers of  $[\text{H}(\text{L}^1)]^+$ .

| Atom | $x$     | $y$     | $z$     |
|------|---------|---------|---------|
| N    | 0.2519  | -1.0120 | -1.9767 |
| C    | 0.5732  | -2.4548 | -1.8681 |
| H    | 1.6435  | -2.5480 | -1.6704 |
| H    | 0.3606  | -2.9729 | -2.8166 |
| C    | -0.1512 | -3.1649 | -0.7186 |
| H    | 0.1301  | -4.2263 | -0.7488 |
| H    | -1.2418 | -3.1263 | -0.8271 |
| C    | 0.2888  | -2.5771 | 0.6200  |
| O    | 1.4311  | -2.1500 | 0.7851  |
| N    | -0.6590 | -2.5234 | 1.5969  |
| H    | -1.5821 | -2.8923 | 1.4087  |
| C    | -0.4402 | -1.8265 | 2.8544  |
| H    | 0.6386  | -1.6912 | 2.9514  |
| H    | -0.7746 | -2.4510 | 3.6909  |
| C    | -1.1894 | -0.4857 | 2.9152  |
| H    | -1.1130 | -0.0766 | 3.9374  |
| H    | -2.2531 | -0.6823 | 2.7453  |
| N    | -0.7518 | 0.5044  | 1.9058  |
| C    | -1.8370 | 1.4840  | 1.6680  |
| H    | -2.1193 | 1.9915  | 2.6086  |
| H    | -2.7188 | 0.9047  | 1.3657  |
| C    | -1.5517 | 2.5769  | 0.6273  |
| H    | -0.7620 | 3.2536  | 0.9664  |
| H    | -2.4591 | 3.1922  | 0.5512  |
| C    | -1.1369 | 2.1488  | -0.7826 |
| O    | -0.2098 | 2.7143  | -1.3562 |
| N    | -1.8218 | 1.1093  | -1.3512 |
| C    | -1.5305 | 0.6531  | -2.7040 |
| C    | -0.9520 | -0.7707 | -2.7889 |
| H    | -1.7136 | -1.4832 | -2.4502 |
| H    | -0.7753 | -0.9937 | -3.8573 |
| H    | -0.8471 | 1.3949  | -3.1231 |
| H    | -2.4426 | 0.6800  | -3.3122 |
| H    | -2.6312 | 0.7315  | -0.8790 |
| C    | 0.5292  | 1.1207  | 2.2670  |
| C    | 1.4988  | 1.2479  | 1.1037  |
| C    | 2.6644  | 2.0014  | 1.1347  |
| C    | 3.5031  | 2.0025  | 0.0186  |
| C    | 3.1608  | 1.2777  | -1.1230 |
| C    | 1.9773  | 0.5521  | -1.1299 |
| N    | 1.2302  | 0.5536  | -0.0142 |
| C    | 1.4088  | -0.1879 | -2.3316 |
| H    | 1.1295  | 0.5807  | -3.0603 |
| H    | 2.2134  | -0.7678 | -2.8048 |
| H    | 3.7954  | 1.2886  | -2.0023 |
| H    | 4.4238  | 2.5798  | 0.0372  |
| H    | 2.9151  | 2.5738  | 2.0211  |
| H    | 1.0281  | 0.5034  | 3.0224  |
| H    | 0.4058  | 2.1115  | 2.7300  |
| H    | 0.3745  | -0.0176 | -0.0451 |

**Table S6** Cartesian  $x,y,z$  coordinates of DFT-minimized (B3LYP/6-31G\*) lowest-energy conformers of  $[\text{H}_2(\text{L}^1)]^{2+}$ .

| Atom | $x$     | $y$     | $z$     |
|------|---------|---------|---------|
| C    | -0.9158 | 2.6762  | 1.0510  |
| C    | -0.4308 | 1.1484  | -3.4280 |
| C    | -0.9277 | -2.5985 | 1.4872  |
| C    | 2.3412  | -0.2139 | 1.5695  |
| C    | -0.2434 | 1.1465  | -2.0437 |
| C    | -0.7189 | -1.2468 | -3.3107 |
| C    | -0.6733 | -0.0706 | -4.0639 |
| C    | 2.1673  | -1.7425 | 1.5966  |
| C    | 1.5950  | 2.7040  | 0.7223  |
| C    | -1.7526 | 0.3427  | 1.4221  |
| C    | -2.1285 | 1.7461  | 0.9419  |
| C    | 2.7602  | 1.8255  | 0.2339  |
| C    | 0.0552  | 2.4386  | -1.2869 |
| C    | -0.6304 | -2.3708 | -1.0245 |
| C    | -0.5330 | -1.1491 | -1.9329 |
| C    | 1.3928  | -2.4344 | 0.4652  |
| H    | -0.4091 | -2.3254 | 2.4033  |
| H    | 3.6287  | 2.0927  | 0.8485  |
| H    | 1.7525  | -1.9738 | 2.5796  |
| H    | 1.8268  | -2.2036 | -0.5114 |
| H    | 0.9611  | 2.9061  | -1.6809 |
| H    | -2.9232 | 2.1626  | 1.5740  |
| H    | -0.7547 | 3.1620  | -1.4112 |
| H    | 3.0108  | 2.0408  | -0.8086 |
| H    | 3.1711  | -2.1941 | 1.5848  |
| H    | -2.5302 | 1.7031  | -0.0764 |
| H    | -0.0860 | -3.2279 | -1.4287 |
| H    | 2.8018  | -0.1696 | -0.4432 |
| H    | -0.9433 | -3.6894 | 1.3984  |
| H    | -0.5626 | 2.6857  | 2.0828  |
| H    | -1.1590 | 3.6981  | 0.7506  |
| H    | -0.3849 | 2.0707  | -4.0007 |
| H    | -0.8200 | -0.1042 | -5.1395 |
| H    | 1.4268  | -3.5197 | 0.5930  |
| H    | -3.5204 | -0.4527 | 0.7869  |
| H    | 1.5395  | 2.6479  | 1.8093  |
| H    | -2.7263 | -2.2396 | 2.5637  |
| H    | -3.0261 | -2.6790 | 0.8865  |
| H    | 1.7257  | 3.7449  | 0.4147  |
| H    | -0.9003 | -2.2050 | -3.7881 |
| H    | -1.6748 | -2.6743 | -0.9153 |
| N    | -2.5935 | -0.6761 | 1.1334  |
| N    | -0.3055 | 0.0216  | -1.3210 |
| N    | 2.4597  | 0.3926  | 0.3261  |
| N    | 0.2568  | 2.2073  | 0.1977  |
| N    | -0.0863 | -2.0581 | 0.3495  |
| O    | -0.6498 | 0.1464  | 1.9522  |
| O    | 2.3383  | 0.4362  | 2.5960  |
| C    | -2.3830 | -2.0775 | 1.5341  |
| H    | -0.1227 | -1.0294 | 0.4417  |
| H    | 0.3016  | 1.1810  | 0.3200  |
